# Supplementary material
Source: Springer Nature journal article supplement (https://www.springermedizin.de/resource/supplementary/12913_2007_540_MOESM1_ESM.pdf/9534970)
Supplement: MOESM1 [file 9534970]

Potentially relevant papers  
identified in electronic search  
N = 416

Papers excluded  
→  
N = 99

Adult cohort or mixed cohort with no  
separate analysis for children < 15 years

Papers remaining for review  
N = 317

Papers excluded  
→  
N = 194

Analysis focused on specific non-diabetic  
co-morbidity

Papers remaining for review  
N = 123

Papers excluded  
→  
N = 74

No hospital data collected post-diagnosis

Papers remaining for review  
N = 49

Papers excluded  
→  
N = 17

Main focus on type 2 diabetes mellitus

Papers remaining for more  
detailed evaluation  
N = 32
